# Supplementary material for: A Novel Albumin-Related Nutrition Biomarker Predicts Breast Cancer Prognosis in Neoadjuvant Chemotherapy: A Two-Center Cohort Study
Source: MDPI journal article supplement (doi:10.3390/nu15194292), 2023-10-08
Supplement: s1 [file s1]

**Supplementary Table S1** The relationship between LA and clinicopathological characteristics in the training set.

| Characteristics              | Total<br>(n=400) | High-LA<br>(n=349) | Low-LA<br>(n=51) | <i>p</i> |
|------------------------------|------------------|--------------------|------------------|----------|
| <b>Age (years)</b>           |                  |                    |                  |          |
| median (IQR)                 | 48(40, 56)       | 48(40, 56)         | 49(45,55)        | 0.494    |
| ≤50                          | 236 (59.00%)     | 205 (58.70%)       | 31 (60.80%)      | 0.901    |
| >50                          | 164 (41.00%)     | 144 (41.30%)       | 20 (39.20%)      |          |
| <b>BMI(kg/m<sup>2</sup>)</b> |                  |                    |                  |          |
| median (IQR)                 | 23.1(21.5, 25.0) | 23.0(21.5, 25.0)   | 23.6(21.6, 25.5) | 0.627    |
| ≤25                          | 302 (75.50%)     | 264 (75.60%)       | 38 (74.50%)      | 0.999    |
| >25                          | 98 (24.50%)      | 85 (24.40%)        | 13 (25.50%)      |          |
| <b>Menopausal status</b>     |                  |                    |                  |          |
| Pre-menopausal               | 244 (61.00%)     | 210 (60.20%)       | 34 (66.70%)      | 0.463    |
| Post-menopausal              | 156 (39.00%)     | 139 (39.80%)       | 17 (33.30%)      |          |
| <b>Histological types</b>    |                  |                    |                  |          |
| IDC                          | 372 (93.00%)     | 322 (92.30%)       | 50 (98.00%)      | 0.472    |
| ILC                          | 11 (2.80%)       | 11 (3.20%)         | 0 (0.00%)        |          |
| Others                       | 16 (4.00%)       | 15 (4.30%)         | 1 (2.00%)        |          |
| Missing data                 | 1 (0.20%)        | 1 (0.30%)          | 0 (0.00%)        |          |
| <b>Histological grade</b>    |                  |                    |                  |          |
| I                            | 5 (1.20%)        | 5 (1.40%)          | 0 (0.00%)        | 0.385    |
| II                           | 192 (48.00%)     | 172 (49.30%)       | 20 (39.20%)      |          |
| III                          | 124 (31.00%)     | 104 (29.80%)       | 20 (39.20%)      |          |
| Missing data                 | 79 (19.80%)      | 68 (19.50%)        | 11 (21.60%)      |          |
| <b>cT Stage</b>              |                  |                    |                  |          |
| T1-T2                        | 244 (61.00%)     | 215 (61.60%)       | 29 (56.90%)      | 0.621    |
| T3-T4                        | 156 (39.00%)     | 134 (38.40%)       | 22 (43.10%)      |          |
| <b>cN Stage</b>              |                  |                    |                  |          |
| N0-N1                        | 70 (17.50%)      | 66 (18.90%)        | 4 (7.80%)        | 0.081    |
| N2-N3                        | 330 (82.50%)     | 283 (81.10%)       | 47 (92.20%)      |          |
| <b>yT Stage</b>              |                  |                    |                  |          |
| Tis/T0                       | 75 (18.80%)      | 68 (19.50%)        | 7 (13.70%)       | 0.334    |
| T1                           | 107 (26.80%)     | 91 (26.10%)        | 16 (31.40%)      |          |
| T2                           | 156 (39.00%)     | 140 (40.10%)       | 16 (31.40%)      |          |
| T3                           | 37 (9.20%)       | 30 (8.60%)         | 7 (13.70%)       |          |
| T4                           | 25 (6.20%)       | 20 (5.70%)         | 5 (9.80%)        |          |
| <b>yN Stage</b>              |                  |                    |                  |          |
| N0                           | 159 (39.80%)     | 138 (39.50%)       | 21 (41.20%)      | 0.925    |
| N1                           | 108 (27.00%)     | 93 (26.60%)        | 15 (29.40%)      |          |
| N2                           | 75 (18.80%)      | 67 (19.20%)        | 8 (15.70%)       |          |
| N3                           | 58 (14.50%)      | 51 (14.60%)        | 7 (13.70%)       |          |
| <b>pCR</b>                   |                  |                    |                  |          |
| No                           | 335 (83.80%)     | 291 (83.40%)       | 44 (86.30%)      | 0.749    |

| Characteristics                | Total<br>(n=400) | High-LA<br>(n=349) | Low-LA<br>(n=51) | <i>p</i> |
|--------------------------------|------------------|--------------------|------------------|----------|
| Yes                            | 65 (16.20%)      | 58 (16.60%)        | 7 (13.70%)       |          |
| <b>HR status</b>               |                  |                    |                  |          |
| Negative                       | 135 (33.80%)     | 114 (32.70%)       | 21 (41.20%)      | 0.125    |
| Positive                       | 263 (65.80%)     | 234 (67.00%)       | 29 (56.90%)      |          |
| Missing data                   | 2 (0.50%)        | 1 (0.30%)          | 1 (2.00%)        |          |
| <b>HER2 status</b>             |                  |                    |                  |          |
| Negative                       | 220 (55.00%)     | 185 (53.00%)       | 35 (68.60%)      | 0.101    |
| Positive                       | 173 (43.20%)     | 158 (45.30%)       | 15 (29.40%)      |          |
| Missing data                   | 7 (1.80%)        | 6 (1.70%)          | 1 (2.00%)        |          |
| <b>Ki-67(%)</b>                |                  |                    |                  |          |
| median (IQR)                   | 30(20, 53)       | 30(20,50)          | 40(20, 60)       | 0.505    |
| ≤ 14                           | 52 (13.00%)      | 44 (12.60%)        | 8 (15.70%)       | 0.081    |
| >14                            | 340 (85.00%)     | 300 (86.00%)       | 40 (78.40%)      |          |
| missing data                   | 8 (2.00%)        | 5 (1.40%)          | 3 (5.90%)        |          |
| <b>Lymphovascular invasion</b> |                  |                    |                  |          |
| No                             | 238 (59.50%)     | 208 (59.60%)       | 30 (58.80%)      | 0.446    |
| Yes                            | 155 (38.80%)     | 136 (39.00%)       | 19 (37.30%)      |          |
| missing data                   | 7 (1.80%)        | 5 (1.40%)          | 2 (3.90%)        |          |
| <b>Type of primary surgery</b> |                  |                    |                  |          |
| Mastectomy                     | 363 (90.80%)     | 314 (90.00%)       | 49 (96.10%)      | 0.251    |
| BCS                            | 37 (9.20%)       | 35 (10.00%)        | 2 (3.90%)        |          |

**Abbreviations:** IQR, inter-quarter range; BMI, body mass index; IDC, invasive ductal carcinoma; ILC, invasive lobular carcinoma; pCR, pathologic complete response; HR, hormone receptors; BCS, breast conserving surgery; HER2, human epidermal growth factor receptor-2; NAC, neoadjuvant chemotherapy

**Supplementary Table S2** Univariate and multivariate Cox regression analyses of DFS in the training cohort.

| Characteristic               | Univariate analysis |          | Multivariate analysis |          |
|------------------------------|---------------------|----------|-----------------------|----------|
|                              | Hazard ratio(95%CI) | <i>p</i> | Hazard ratio(95%CI)   | <i>p</i> |
| <b>Age (years)</b>           |                     |          |                       |          |
| ≤50                          | 1                   |          |                       |          |
| >50                          | 0.76(0.68-1.33)     | 0.756    |                       |          |
| <b>Menopausal status</b>     |                     |          |                       |          |
| Pre-menopausal               | 1                   |          |                       |          |
| Post-menopausal              | 0.89(0.63-1.25)     | 0.493    |                       |          |
| <b>BMI(kg/m<sup>2</sup>)</b> |                     |          |                       |          |
| ≤25                          | 1                   |          |                       |          |
| >25                          | 1.02(0.69-1.49)     | 0.930    |                       |          |
| <b>Histological types</b>    |                     |          |                       |          |
| IDC                          | 1                   |          |                       |          |
| Others                       | 0.95(0.52-1.76)     | 0.953    |                       |          |
| <b>Histological grade</b>    |                     |          |                       |          |
| I                            | 1                   |          |                       |          |
| II                           | 0.61(0.08-4.38)     | 0.619    |                       |          |
| III                          | 0.89(0.12-6.47)     | 0.909    |                       |          |
| <b>cT Stage</b>              |                     |          |                       |          |
| T1-T2                        | 1                   |          |                       |          |
| T3-T4                        | 1.51(1.09-2.11)     | 0.014    |                       |          |
| <b>cN Stage</b>              |                     |          |                       |          |
| N0-N1                        | 1                   |          |                       |          |
| N2-N3                        | 1.03(0.67-1.60)     | 0.889    |                       |          |
| <b>ypT Stage</b>             |                     |          |                       |          |
| Tis/T0                       | 1                   |          | 1                     |          |
| T1-T2                        | 2.23(1.19-4.16)     | 0.012    | 1.88(0.98-3.62)       | 0.058    |
| T3-T4                        | 3.57(1.81- 7.03)    | <0.001   | 2.40(1.16-4.97)       | 0.019    |
| <b>ypN Stage</b>             |                     |          |                       |          |
| N0                           | 1                   |          | 1                     |          |
| N1                           | 1.47(0.93-2.33)     | 0.097    | 1.51(0.93-2.47)       | 0.098    |
| N2                           | 2.26(1.42-3.60)     | 0.001    | 2.37(1.43-3.92)       | <0.001   |
| N3                           | 2.94(1.82-4.74)     | <0.001   | 3.24(1.92-5.47)       | <0.001   |
| <b>pCR</b>                   |                     |          |                       |          |
| No                           | 1                   |          |                       |          |
| Yes                          | 0.41(0.21-0.80)     | 0.009    |                       |          |
| <b>HR status</b>             |                     |          |                       |          |
| Negative                     | 1                   |          | 1                     |          |
| Positive                     | 0.64(0.46-0.90)     | 0.011    | 0.52(0.36-0.74)       | <0.001   |
| <b>HER2 status</b>           |                     |          |                       |          |
| Negative                     | 1                   |          |                       |          |
| Positive                     | 1.09(0.78-1.54)     | 0.606    |                       |          |

| Characteristic                 | Univariate analysis |          | Multivariate analysis |          |
|--------------------------------|---------------------|----------|-----------------------|----------|
|                                | Hazard ratio(95%CI) | <i>p</i> | Hazard ratio(95%CI)   | <i>p</i> |
| <b>Ki-67(%)</b>                |                     |          |                       |          |
| ≤ 14                           | 1                   |          |                       |          |
| >14                            | 1.70(0.99-2.92)     | 0.053    |                       |          |
| <b>Lymphovascular invasion</b> |                     |          |                       |          |
| No                             | 1                   |          |                       |          |
| Yes                            | 1.40(0.99-1.96)     | 0.055    |                       |          |
| <b>LA</b>                      |                     |          |                       |          |
| High                           | 1                   |          | 1                     |          |
| Low                            | 1.99(1.30-3.06)     | 0.002    | 2.00(1.29-3.11)       | 0.002    |

**Abbreviations:** IQR, inter-quarter range; BMI, body mass index; IDC, invasive ductal carcinoma; pCR, pathologic complete response; HR, hormone receptors; HER2, human epidermal growth factor receptor-2

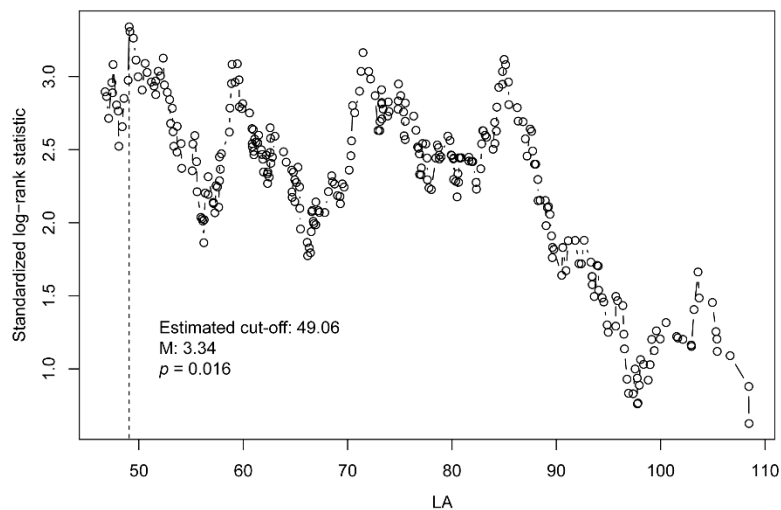

**Supplementary Figure S1.** Dot plot showing the standardized log-rank test statistic for DFS according to LA before NAC. Abbreviations: DFS: disease-free survival; M: standardized log-rank test statistic

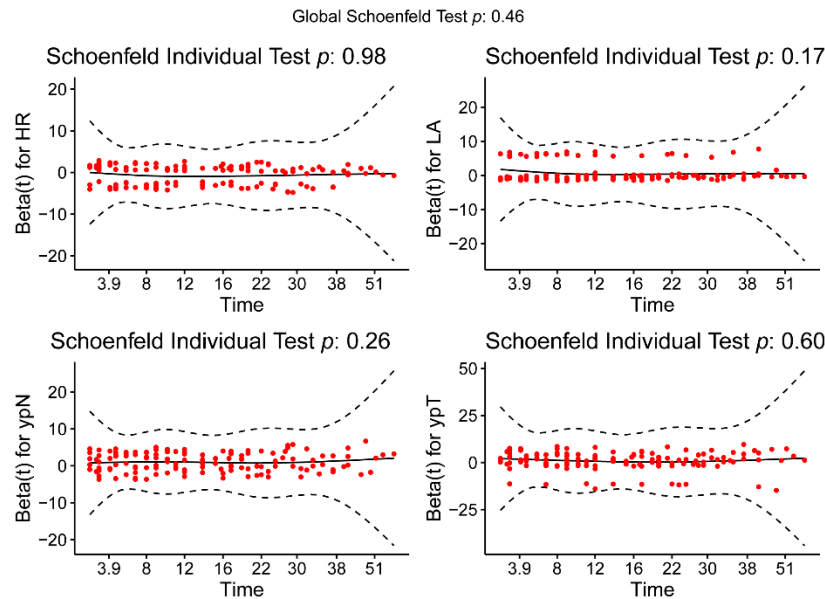

**Supplementary Figure S2.** Schoenfeld Residuals Plot for Cox Proportional Hazards Model of HR Status, LA, ypN Stage and ypT Stage. Abbreviations: HR, hormone receptors

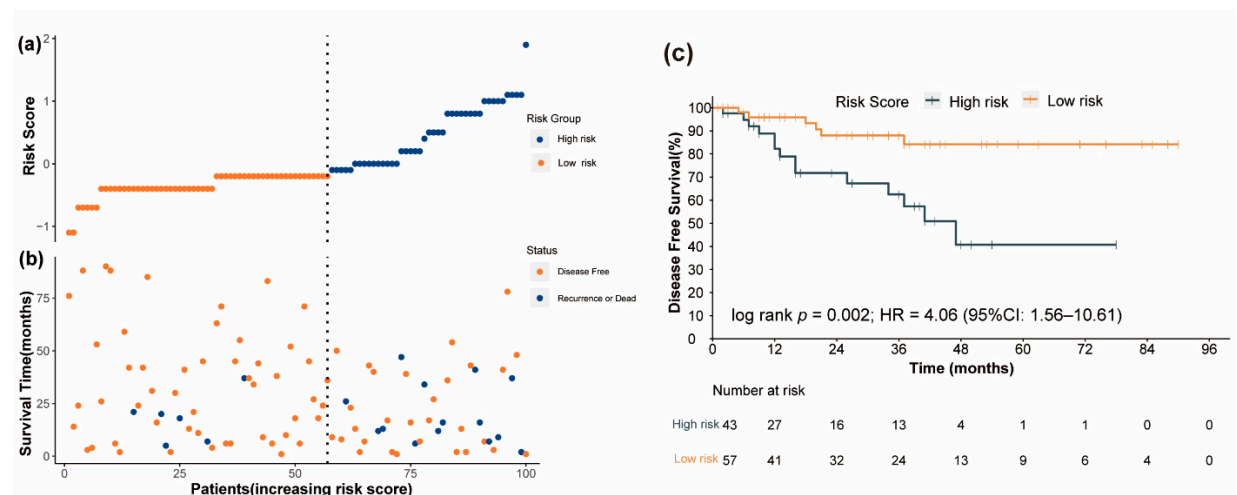

**Supplementary Figure S3.** The performance of risk stratification using the prognostic nomogram model in the internal validation cohort ("Number at risk" represents the remaining number of individuals exposed to the outcome risk at the corresponding time point). (a) The distribution and median value of the risk scores. (b) The distribution of DFS, DFS status, and risk score. (c) The Kaplan–Meier curves for the DFS of patients who were divided into high-risk and low-risk group.

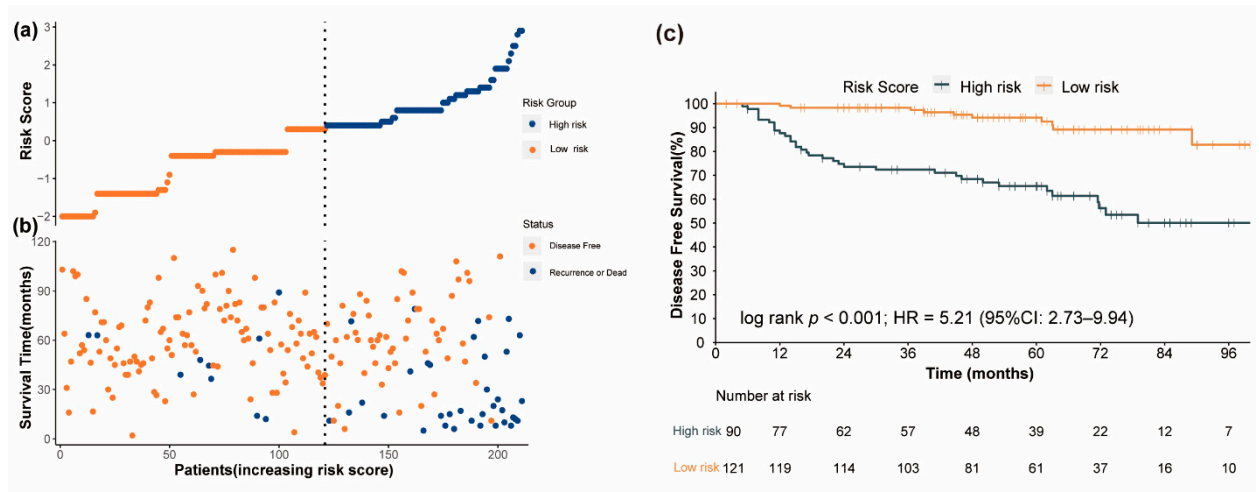

**Supplementary Figure S4.** The performance of risk stratification using the prognostic nomogram model in the external validation cohort ("Number at risk" represents the remaining number of individuals exposed to the outcome risk at the corresponding time point). (a) The distribution and median value of the risk scores. (b) The distribution of DFS, DFS status, and risk score. (c) The Kaplan–Meier curves for the DFS of patients who were divided into high-risk and low-risk group.
